# Supplementary material for: Identifying Outliers of the MODIS Leaf Area Index Data by Including Temporal Patterns in Post-Processing
Source: MDPI journal article supplement (doi:10.3390/rs15205042), 2023-10-20
Supplement: s1 [file s1]

Archive with 7 entries (7 files):
- Figure S1.tif
- Figure S2.tif
- Figure S3.tif
- remotesensing-2582366-supplementary.pdf
- Table S1.xls
- Table S2.xls
- Table S3.xls
