# Supplementary material for: Identifying Outliers of the MODIS Leaf Area Index Data by Including Temporal Patterns in Post-Processing
Source: MDPI journal article supplement (doi:10.3390/rs15205042), 2023-10-20
Supplement: s1 [file s1 › Table S1.xls]

## Sheet: Table S1
No.	Lat	Lon	modis_lucc	Greenup	Maturity	Peak	Dormancy	No.	Lat	Lon	modis_lucc	Greenup	Maturity	Peak	Dormancy
0	28.7907	-102.061	10	84	162	192	345	167	-1.98031	-46.2437	2	60	180	220	260
1	-14.3618	-43.3814	10	-65	-5	12	128	168	68.5973	162.525	10	105	195	210	285
2	1.07286	-51.9217	2	193	234	358	521	169	54.8838	73.1591	12	126	170	185	293
3	48.5257	77.5674	10	115	150	165	240	170	67.4456	-103.113	10	150	180	200	65
6	32.232	102.067	5	89	183	208	294	171	47.0054	127.722	12	143	195	210	280
8	-51.521	-72.3209	10	278	329	347	489	172	68.9288	-121.313	10	105	205	215	270
9	26.475	113.137	8	84	162	190	330	173	-33.8483	140.774	7	-95	15	45	165
10	-21.3894	15.4806	7	30	90	120	180	174	67.3171	174.072	7	88	182	201	264
12	-17.9792	-67.7275	10	-50	34	56	151	175	26.4103	127.795	9	93	194	224	383
13	34.0474	49.8462	16	30	90	120	180	177	44.6591	116.227	10	161	208	223	297
14	37.8153	-79.6318	4	102	163	187	300	178	18.2638	-72.55	9	93	228	247	406
15	-12.5223	38.8518	9	-49	29	63	180	179	-30.6557	28.1509	10	-52	29	62	225
16	11.0238	37.6522	12	175	234	255	364	180	40.6159	-6.60658	8	18	95	112	212
17	-46.2367	-71.504	10	120	160	170	200	181	-3.70279	13.6681	8	30	60	90	180
18	56.1782	98.2054	8	131	182	201	284	182	-9.67168	32.0801	9	-99	5	36	197
19	58.9021	57.7121	5	129	179	198	272	183	-0.28134	39.7393	10	283	335	350	427
20	57.4947	105.969	1	138	181	195	266	184	59.8791	163.392	7	166	202	218	294
21	41.1143	115.457	10	131	186	208	282	185	-0.0213067	114.166	2	30	80	120	160
22	-15.5246	19.458	10	274	341	363	529	186	2.93636	98.5689	14	15	95	134	255
23	-26.7252	119.583	7	90	150	180	200	187	-1.52513	102.495	2	30	60	90	120
24	17.7696	80.7891	12	172	244	268	401	188	4.60199	101.841	2	90	120	150	180
25	45.6135	122.085	10	169	214	229	290	189	15.2501	105.648	10	61	198	212	269
26	-25.7053	25.4983	10	-81	16	40	147	190	17.3321	99.3422	2	88	157	200	368
27	51.7566	29.2286	12	104	156	177	346	191	21.4962	96.0705	12	116	163	291	362
28	49.2303	6.59121	9	95	149	171	310	192	21.2582	102.495	8	113	175	195	365
29	-5.72675	-80.1354	10	10	70	90	120	193	18.2244	103.685	12	106	186	214	345
31	66.3544	-93.0955	10	90	120	150	180	194	29.2056	117.7	8	90	150	176	324
33	0.913679	-58.5428	2	213	247	261	312	195	29.2142	120.517	8	85	147	174	329
34	13.8577	-15.5749	12	184	248	268	350	196	28.3147	119.746	12	85	228	242	313
35	61.4399	120.194	8	139	185	202	266	197	27.1155	118.561	8	70	174	201	334
36	68.3069	138.775	16	120	160	180	220	198	25.7878	117.79	5	84	164	193	344
37	-4.36452	17.954	9	239	296	322	499	199	24.974	116.648	9	85	176	244	374
42	51.1038	-101.097	12	135	178	192	277	200	27.6866	117.276	2	76	156	193	335
43	69.4235	174.828	7	158	197	211	270	201	27.1155	115.506	5	67	153	183	321
44	57.6494	45.3367	5	119	170	199	313	202	29.3855	119.518	8	93	218	233	295
45	55.688	-70.1899	9	141	199	216	350	203	27.6866	117.276	2	76	156	193	335
46	0.111479	30.9658	9	113	267	290	383	204	29.5854	115.706	8	93	151	188	344
47	55.19	79.3929	9	125	169	188	283	205	30.7846	118.447	12	134	207	228	301
48	6.72772	-73.2217	10	120	150	180	270	207	28.1863	114.992	9	94	172	200	316
49	64.6696	99.1767	7	132	189	211	272	208	25.7449	105.85	9	113	185	206	344
51	-6.29906	-51.5128	9	-112	-28	41	198	209	27.0774	108.087	8	86	153	189	335
52	41.8439	-5.74767	10	35	150	160	190	210	23.2227	109.276	12	93	157	245	334
53	47.2689	-73.6607	8	128	183	201	291	211	23.6034	104.946	9	110	184	204	327
54	38.6595	-107.957	10	150	210	240	285	213	30.837	113.464	12	71	190	209	293
55	68.2296	69.7912	7	152	199	216	288	214	34.8821	115.035	12	73	216	236	300
57	58.9594	140.758	9	126	172	191	277	215	37.0236	117.509	12	92	205	222	297
58	-10.9025	18.9794	8	249	301	333	491	216	36.8332	114.94	12	153	209	228	307
59	-29.5473	151.256	10	-41	104	122	195	217	37.1663	111.037	10	146	204	221	282
60	32.784	59.7387	16	90	150	180	245	218	32.6454	107.849	8	85	141	190	331
61	61.4742	38.5854	5	134	191	209	285	219	28.2672	104.184	9	129	182	202	328
62	7.27365	-2.68919	9	50	131	191	362	220	25.6973	97.8551	2	114	194	231	385
64	40.823	-97.4405	12	120	194	213	302	221	26.1732	95.3328	2	245	280	330	385
65	5.72152	-70.5694	9	45	100	120	160	222	25.0787	90.4311	12	45	135	150	175
68	-26.3624	-54.2392	2	265	332	361	514	223	25.8401	84.9584	12	-60	15	45	95
69	55.8703	64.1473	14	124	177	198	303	224	23.6986	82.2458	9	176	244	267	404
70	61.5872	95.7611	8	150	180	210	245	225	3.06866	22.7593	2	45	100	130	190
71	-7.77123	141.981	2	*	*	*	*	226	6.20955	13.3366	9	83	161	236	353
73	66.5774	-95.9077	10	104	204	223	284	227	8.6366	23.0448	9	80	195	238	346
74	44.3206	17.9107	4	88	138	159	312	228	6.92339	12.0517	9	61	162	203	347
75	37.6964	-108.561	10	105	148	165	326	229	4.49634	40.8908	10	90	120	150	180
76	30.2532	109.299	5	87	149	172	325	230	31.2251	-99.0721	10	115	195	225	335
77	50.2358	-80.8158	8	135	190	213	320	231	34.1994	-91.1009	4	89	142	165	315
78	50.1195	57.1418	10	117	158	175	312	232	34.5564	-83.2487	8	73	135	192	327
79	-13.6794	28.1959	5	-88	-16	37	194	233	46.3347	-93.0045	8	116	174	196	314
81	57.7227	18.4628	12	131	177	192	330	234	53.3541	-93.0045	8	123	178	196	294
82	42.5887	18.4321	9	89	144	162	316	235	45.5019	-101.095	10	93	135	149	307
84	63.6517	153.748	7	150	191	209	274	236	47.6434	-110.731	12	125	171	183	239
85	-26.4112	19.8535	7	-45	30	45	105	237	54.5438	-109.542	4	118	173	196	286
86	-3.61951	-69.7851	2	*	*	*	*	238	50.1418	-118.346	8	150	191	208	289
87	47.8028	38.3374	12	143	190	206	285	239	42.5276	-116.323	10	35	135	165	210
91	63.8939	-20.1605	16	180	200	220	240	240	48.1193	-117.751	10	77	137	164	334
92	48.9441	-100.771	12	143	184	197	261	241	43.7173	-112.397	10	10	105	120	270
94	66.42	38.5183	9	145	197	213	285	242	42.1706	-105.616	10	99	163	180	292
95	58.6257	66.8382	9	113	177	199	308	243	37.5307	-98.5962	12	60	95	120	150
96	28.8213	97.2427	8	90	210	240	309	244	35.1512	-102.284	10	132	173	184	315
98	29.1185	102.356	5	84	146	182	305	245	23.8488	-101.69	7	161	244	262	326
99	50.5939	134.627	10	120	180	200	265	246	19.2088	-99.429	12	142	214	239	356
101	57.4322	15.5071	1	117	170	205	315	247	16.4725	-90.9819	2	108	198	232	338
102	60.711	76.3485	8	129	177	195	283	248	0.76802	-65.2362	2	-60	60	95	150
103	8.10985	35.684	8	70	183	219	369	249	-6.84626	-59.1447	2	201	298	328	432
104	53.1449	121.286	3	108	178	205	273	250	-12.557	-60.4772	2	30	120	200	330
106	40.6574	125.968	12	127	196	217	294	251	-19.9809	-60.6676	8	-23	40	71	202
107	-17.8058	141.59	10	-50	30	50	150	252	-20.7423	-50.9594	12	-60	60	80	150
109	33.1506	44.8847	12	-13	35	54	124	253	-15.222	-51.9112	10	-61	24	69	204
110	0.109835	-73.3036	2	-70	30	90	140	254	-10.2727	-70.1854	2	265	313	335	488
111	52.1	29.7302	8	112	157	185	304	255	-7.03661	-76.0865	2	105	180	210	305
113	-18.3717	134.343	10	12	59	73	151	256	-26.0723	-60.6676	8	-65	15	45	155
114	-8.51673	24.489	9	-120	35	60	150	257	-36.7323	-69.0433	10	120	180	210	270
117	48.0198	32.8229	12	148	200	217	296	258	-7.9884	-41.4416	10	-51	2	21	174
119	-24.0732	123.01	7	80	150	180	200	259	64.3472	-136.81	9	134	179	196	275
120	-25.5692	129.056	7	*	*	*	*	260	66.4411	-150.326	7	140	186	201	303
121	66.3732	51.8369	9	147	194	209	276	261	65.4894	-155.275	7	132	187	202	280
122	31.1852	70.4552	7	-30	25	45	120	263	62.8244	-115.681	8	105	180	210	285
123	67.1529	62.3791	7	101	197	214	328	264	50.6415	19.0919	5	102	147	165	320
124	-10.1053	-46.1971	10	-35	90	140	165	265	57.8751	33.9398	5	127	175	193	290
125	60.7143	79.1583	11	71	179	202	362	266	51.974	41.7444	12	120	180	200	265
126	-25.4056	133.031	7	150	180	200	315	267	54.0679	50.8815	12	129	178	196	288
127	58.4453	114.15	9	145	189	204	379	268	60.9208	49.7394	5	120	173	193	285
128	25.2415	113.365	2	72	141	173	333	269	17.3291	75.4376	10	210	270	300	395
129	62.557	173.146	7	141	188	204	269	270	-21.38	145.444	7	65	150	200	300
131	43.5345	-80.8326	12	116	185	216	325	271	-27.0431	147.253	6	-45	90	105	195
132	35.6717	93.925	16	60	100	150	190	272	-31.9924	147.348	10	169	234	250	319
133	62.7181	28.3587	8	126	178	198	300	273	-34.8478	146.206	10	154	227	248	338
134	32.1132	-109.071	7	60	90	158	265	274	-29.8509	132.929	7	145	240	270	330
135	65.1236	146.614	10	151	191	205	269	275	-29.8033	119.889	6	60	150	180	270
136	47.267	130.759	12	158	207	224	289	276	-34.0387	117.414	12	100	230	256	338
137	-34.2802	-63.4711	10	-66	-20	3	167	277	-30.2792	116.13	12	156	244	261	323
138	54.8655	106.496	5	129	178	196	271	278	-26.9955	115.463	7	85	166	175	210
139	-21.4244	25.8719	10	-45	60	90	165	279	-24.045	115.273	7	65	175	235	305
140	33.8273	104.582	5	100	159	182	298	280	-23.1884	115.511	7	45	165	195	265
141	11.1977	104.896	12	153	289	305	436	281	-21.7131	120.746	7	-95	30	45	180
142	7.83379	47.5885	7	300	350	366	405	282	-19.524	123.125	7	45	115	135	245
145	52.699	11.6832	12	77	126	142	202	283	-17.5729	124.934	10	18	62	78	154
146	4.99726	-8.9186	8	43	133	152	330	284	-16.2404	128.312	7	-40	60	90	150
148	53.7898	-101.88	8	99	180	205	289	285	-14.9079	130.501	10	-53	14	34	161
149	13.7528	45.9013	16	90	120	150	190	286	-13.3374	133.166	9	-25	60	80	180
150	55.4558	135.182	9	132	184	205	275	287	36.4743	139.23	8	95	154	183	330
151	53.7173	89.4728	5	137	183	200	280	288	36.4743	128.237	12	120	199	222	316
153	58.9246	-112.852	8	127	178	197	283	289	16.7724	121.313	9	113	253	282	444
154	61.4712	-121.956	8	124	176	197	277	290	4.35161	116.602	2	90	120	180	270
155	-29.1891	-67.6163	7	-57	5	24	147	291	69.9494	102.597	7	164	199	212	269
156	56.2163	-75.9422	8	147	199	216	297	292	66.2374	111.639	7	151	192	206	262
157	50.2651	79.1781	10	90	180	201	245	293	67.3796	125.154	9	159	195	209	269
158	55.2039	-60.1652	10	88	197	219	321	294	62.811	129.723	9	148	189	207	278
159	49.1961	63.5928	10	90	150	180	225	295	60.2412	131.246	3	136	185	204	276
160	65.8562	83.9226	9	138	185	201	285	296	64.8098	140.859	7	134	193	207	282
161	41.1363	-88.5698	12	131	196	212	280	297	68.8073	145.427	7	144	192	208	270
162	41.8325	23.9383	1	88	170	191	298	298	66.9037	153.137	9	152	190	204	272
164	29.529	84.8144	10	172	212	228	285	299	65.3971	16.8139	8	154	187	204	283
165	55.7333	-103.256	5	119	167	190	281	300	62.5655	25.0825	1	127	177	197	291
166	48.3207	88.5832	10	100	150	180	270
