# Supplementary material for: Identifying Outliers of the MODIS Leaf Area Index Data by Including Temporal Patterns in Post-Processing
Source: MDPI journal article supplement (doi:10.3390/rs15205042), 2023-10-20
Supplement: s1 [file s1 › Table S2.xls]

## Sheet: Table S2
No.	Lat	Lon	modis_lucc	Greenup_2_1	Maturity_2_1	Peak_2_1	Dormancy_2_1	Greenup_2_2	Maturity_2_2	Peak_2_2	Dormancy_2_2
0	33.3605	114.168	12	41	93	108	151	178	209	222	288
1	32.5625	114.627	12	19	91	106	148	177	211	224	286
2	32.9544	120.191	12	36	97	112	156	186	223	238	296
3	34.5559	109.268	12	41	93	109	160	192	229	242	299
4	37.5704	114.842	12	68	104	117	159	188	221	233	292
5	35.5083	115.203	12	57	103	117	158	188	226	241	302
6	24.6102	89.31	12	55	87	98	145	220	266	283	355
7	25.133	89.125	12	65	96	107	148	188	239	259	326
8	25.76	83.584	12	4	45	56	109	178	256	277	332
9	29.3174	76.596	12	-12	34	50	110	174	230	249	311
10	30.8761	74.628	12	-21	28	47	108	172	211	226	285
11	0.715021	42.858	10	93	134	151	245	293	325	338	411
12	-0.166381	30.5838	9	91	132	146	201	237	291	318	392
14	-21.8665	-56.3546	9	-78	-17	7	161	264	327	353	412
15	-33.4227	-55.118	9	-108	-1	62	180	259	319	347	426
16	-36.5191	-59.2934	10	-87	66	85	184	257	304	322	485
17	36.5704	-94.6049	12	64	122	142	216	246	277	290	373
