# Supplementary material for: Identifying Outliers of the MODIS Leaf Area Index Data by Including Temporal Patterns in Post-Processing
Source: MDPI journal article supplement (doi:10.3390/rs15205042), 2023-10-20
Supplement: s1 [file s1 › Table S3.xls]

## Sheet: Table S3
No.	Country	Lat	Lon	Site_name	year	Greenup	Maturity	Peak	Dormancy	Greenup2	Maturity2	Peak2	Dormancy2	source
0	Australia	-32.616	116.276	Camerons	2003	95	182	220	331					VALERI
1	England	51.1642	-1.4306	Chilbolton	2005	78	140	160	302					VALERI
2	Germany	53.8919	13.2072	Demmin	2003	80	135	149	208					VALERI
3	Benin	9.7697	1.7453	Donga	2005	62	196	224	337					VALERI
4	Estonia	58.2994	27.2603	Jarvselja	2003	120	169	190	290					VALERI
5	Canada	45.3806	-75.2169	Larose	2003	121	174	196	303					VALERI
6	Belgium	50.7683	4.4111	Sonian forest	2003	100	153	175	321					VALERI
7	Bolivia	-18.2394	-68.1933	Turco	2003	70	190	205	265					VALERI
8	Niger	13.645	2.6353	Wankama	2004	178	228	246	379					VALERI
9	USA	34.3509	-106.69	Sevi	2003	100	160	200	240					Bigfoot
10	China	35.4221	116.529	Shandong	2008	52	94	108	149	182	212	222	279	Reference_c
11	China	45.3668	127.591	NFUMA	2011	118	182	207	286					Reference_c
12	China	32.0667	118.851	Nanjing	2017	83	134	154	318					Reference_c
13	Gwangreung Deciduous forest (previous name: KoFlux Gwangneung Supersite - ?Deciduous forest	37.7489	127.149	GDK	2003	98	145	164	312					PEN
14	Kherlenbayan Ulaan	47.214	108.737	KBU	2004	155	202	218	291					PEN
15	China	45.2786	127.578	LSH	2004	122	185	210	272					PEN
16	Japan	44.3842	142.319	MBF	2003	130	180	215	275					PEN
17	Japan	44.3219	142.261	MMF	2003	135	165	213	285					PEN
18	Japan	36.054	140.027	MSE	2003	152	195	220	289					PEN
19	Palangkaraya drained forest	-2.345	114.036	PDF	2003	120	180	200	240					PEN
20	Pasoh Forest Reserve	2.9667	102.3	PSO	2005	60	200	220	270					PEN
21	Sakaerat	14.4924	101.916	SKR	2004	70	180	200	255					PEN
22	Seto Mixed Forest Site	35.25	137.067	SMF	2003	93	158	184	345					PEN
23	Takayama evergreen coniferous forest site	36.1397	137.371	TKC	2005	95	165	201	315					PEN
24	Yakutsk Spasskaya Pad larch	62.255	129.241	YLF	2005	142	194	211	289					PEN
25	Russia	62.2414	129.651	YPF	2004	125	181	232	272					PEN
26	Tapajos National Forest	-3.017	-54.9707	TNF	2003	70	180	201	248					reference
27	Sinop,Mato Grosso, Brazil.	-11.4125	-55.325	SMG	2007	90	225	240	275					reference
28	Kruger National Park	-24.0079	31.5489	KNP	2015	-64	73	101	203					reference
29	Argentina	-37.939	-67.789	25de Mayo_Shurb	2015	-60	60	90	180					IMAGINES
30	Spain	39.2744	-0.3164	Albufera	2014	154	190	204	266					IMAGINES
31	Spain	39.0544	-2.1007	Barrax-LasTiesas	2014	64	111	126	196					IMAGINES
32	Italy	41.4637	15.4867	Capitanata	2014	31	96	111	247					IMAGINES
33	Italy	41.85	13.59	Collelongo	2015	98	147	169	311					IMAGINES
34	Spain	37.7929	-4.8267	LaReina-Cordoba-2	2013	13	73	92	167					IMAGINES
35	Tunisia	35.5662	9.9122	Merguellil	2013	-3	71	90	187					IMAGINES
36	Canada	45.3056	-75.7673	Ottawa	2014	156	208	225	296					IMAGINES
37	France	43.4471	1.1451	South West-2	2013	61	178	191	245					IMAGINES
38	France	43.5511	1.0889	South West-l	2013	26	102	123	229					IMAGINES
39	AB-Lethbridge	49.7092	-112.94	AB-Lethbridge Grassland	2004	117	166	182	264					Fluxnet-Canada
40	AB-Wpeatland-TreedFen	54.9538	-112.467	AB-Western Peatland	2005	106	180	205	284					Fluxnet-Canada
41	BC-Campbell River 2000 Douglas-fir	49.8705	-125.291	BC-Campbell River 2000 Douglas-fir	2003	98	167	186	341					Fluxnet-Canada
42	ON-Epeatland-MerBleue	45.4094	-75.5187	ON-EPeatland-MerBleue	2003	122	179	206	292					Fluxnet-Canada
43	Ontario Groundhog River	48.133	-81.628	Ontario Juvenile Mixed wood	2003	140	189	204	305					Fluxnet-Canada
44	SK-HJP75	53.8758	-104.645	SK-1975 Jack Pine	2005	130	200	215	280					Fluxnet-Canada
45	China	40.6167	80.85	Akesu	2010	159	200	219	291					CERN
46	China	42.4	128.1	Changbaishan	2003	112	162	186	291					CERN
47	China	30.469	91.0624	Dangxiong	2004	118	202	223	305					CERN
48	China	37.6167	101.317	Haibei	2003	133	198	220	300					CERN
49	China	26.7475	115.067	Qianyanzhou	2003	93	228	247	325					CERN
50	China	31.2667	105.45	Yanting	2003	73	199	217	297					CERN
51	USA	42.538	-72.171	Harvart	2011	98	171	193	305					USA-Flux
