# Supplementary figures and images for: Identifying Outliers of the MODIS Leaf Area Index Data by Including Temporal Patterns in Post-Processing
Source: MDPI journal article supplement (doi:10.3390/rs15205042), 2023-10-20

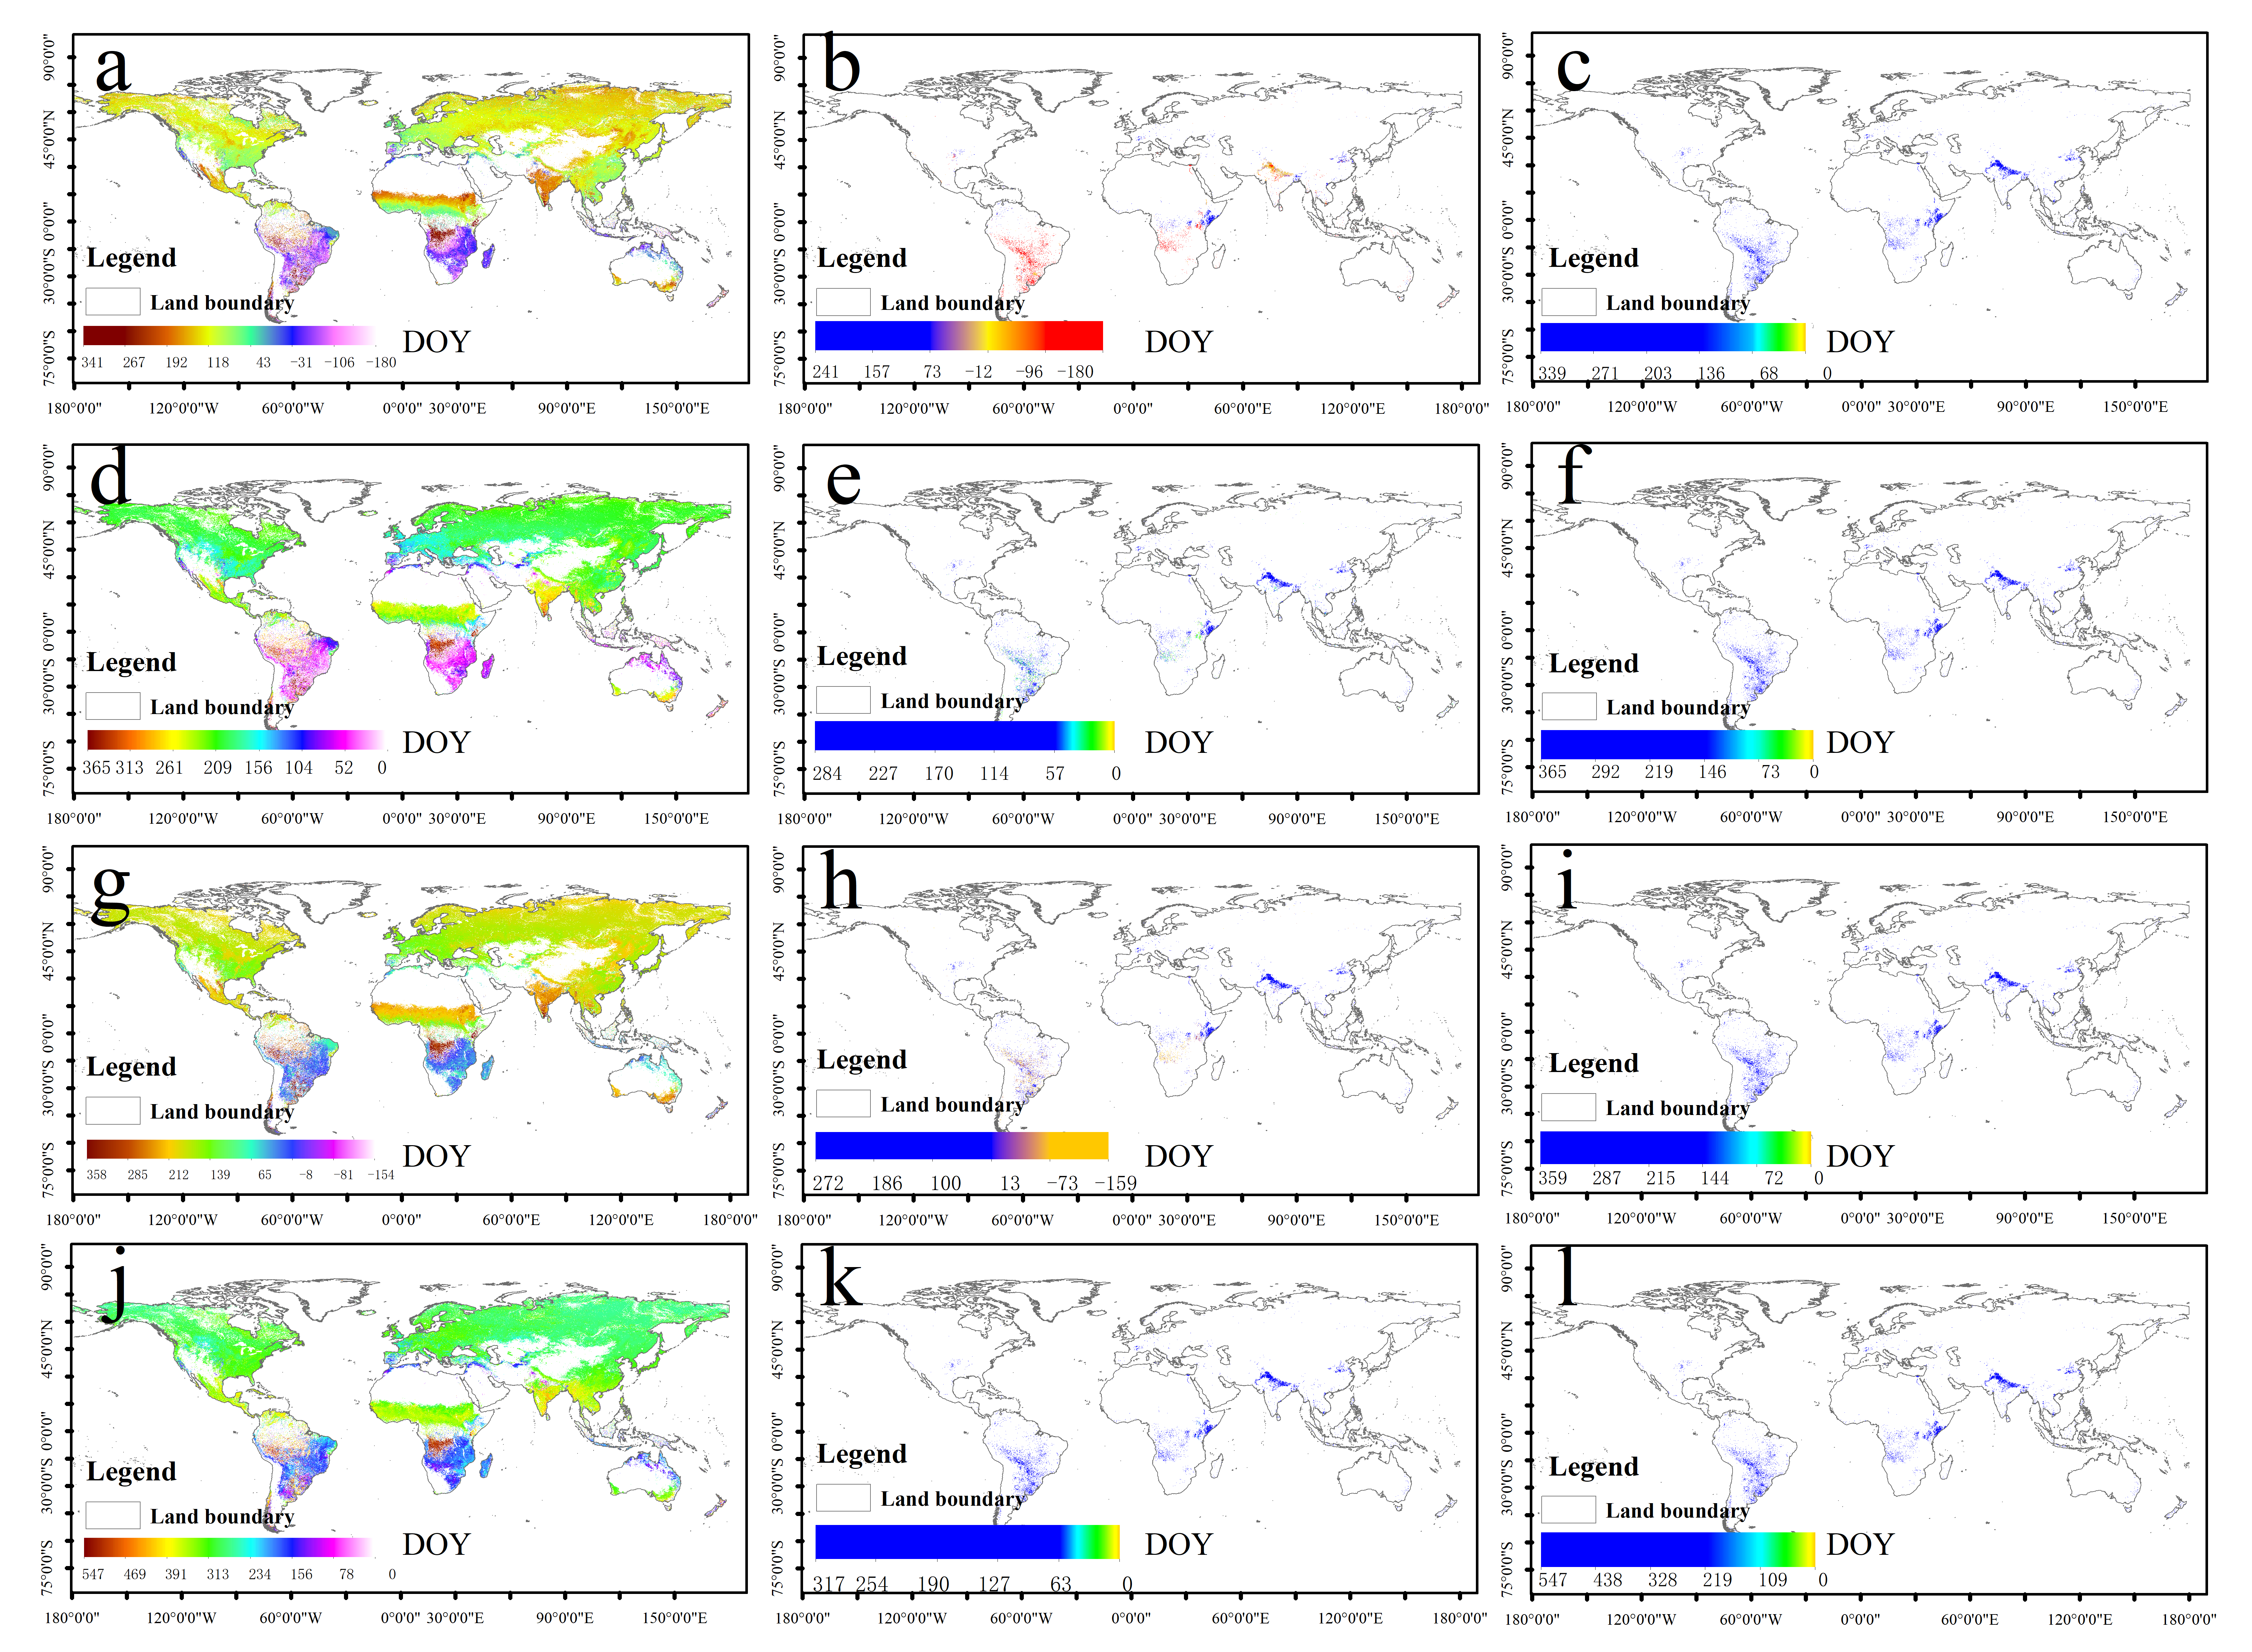

Supplement: s1 [file s1 › Figure S1.tif]

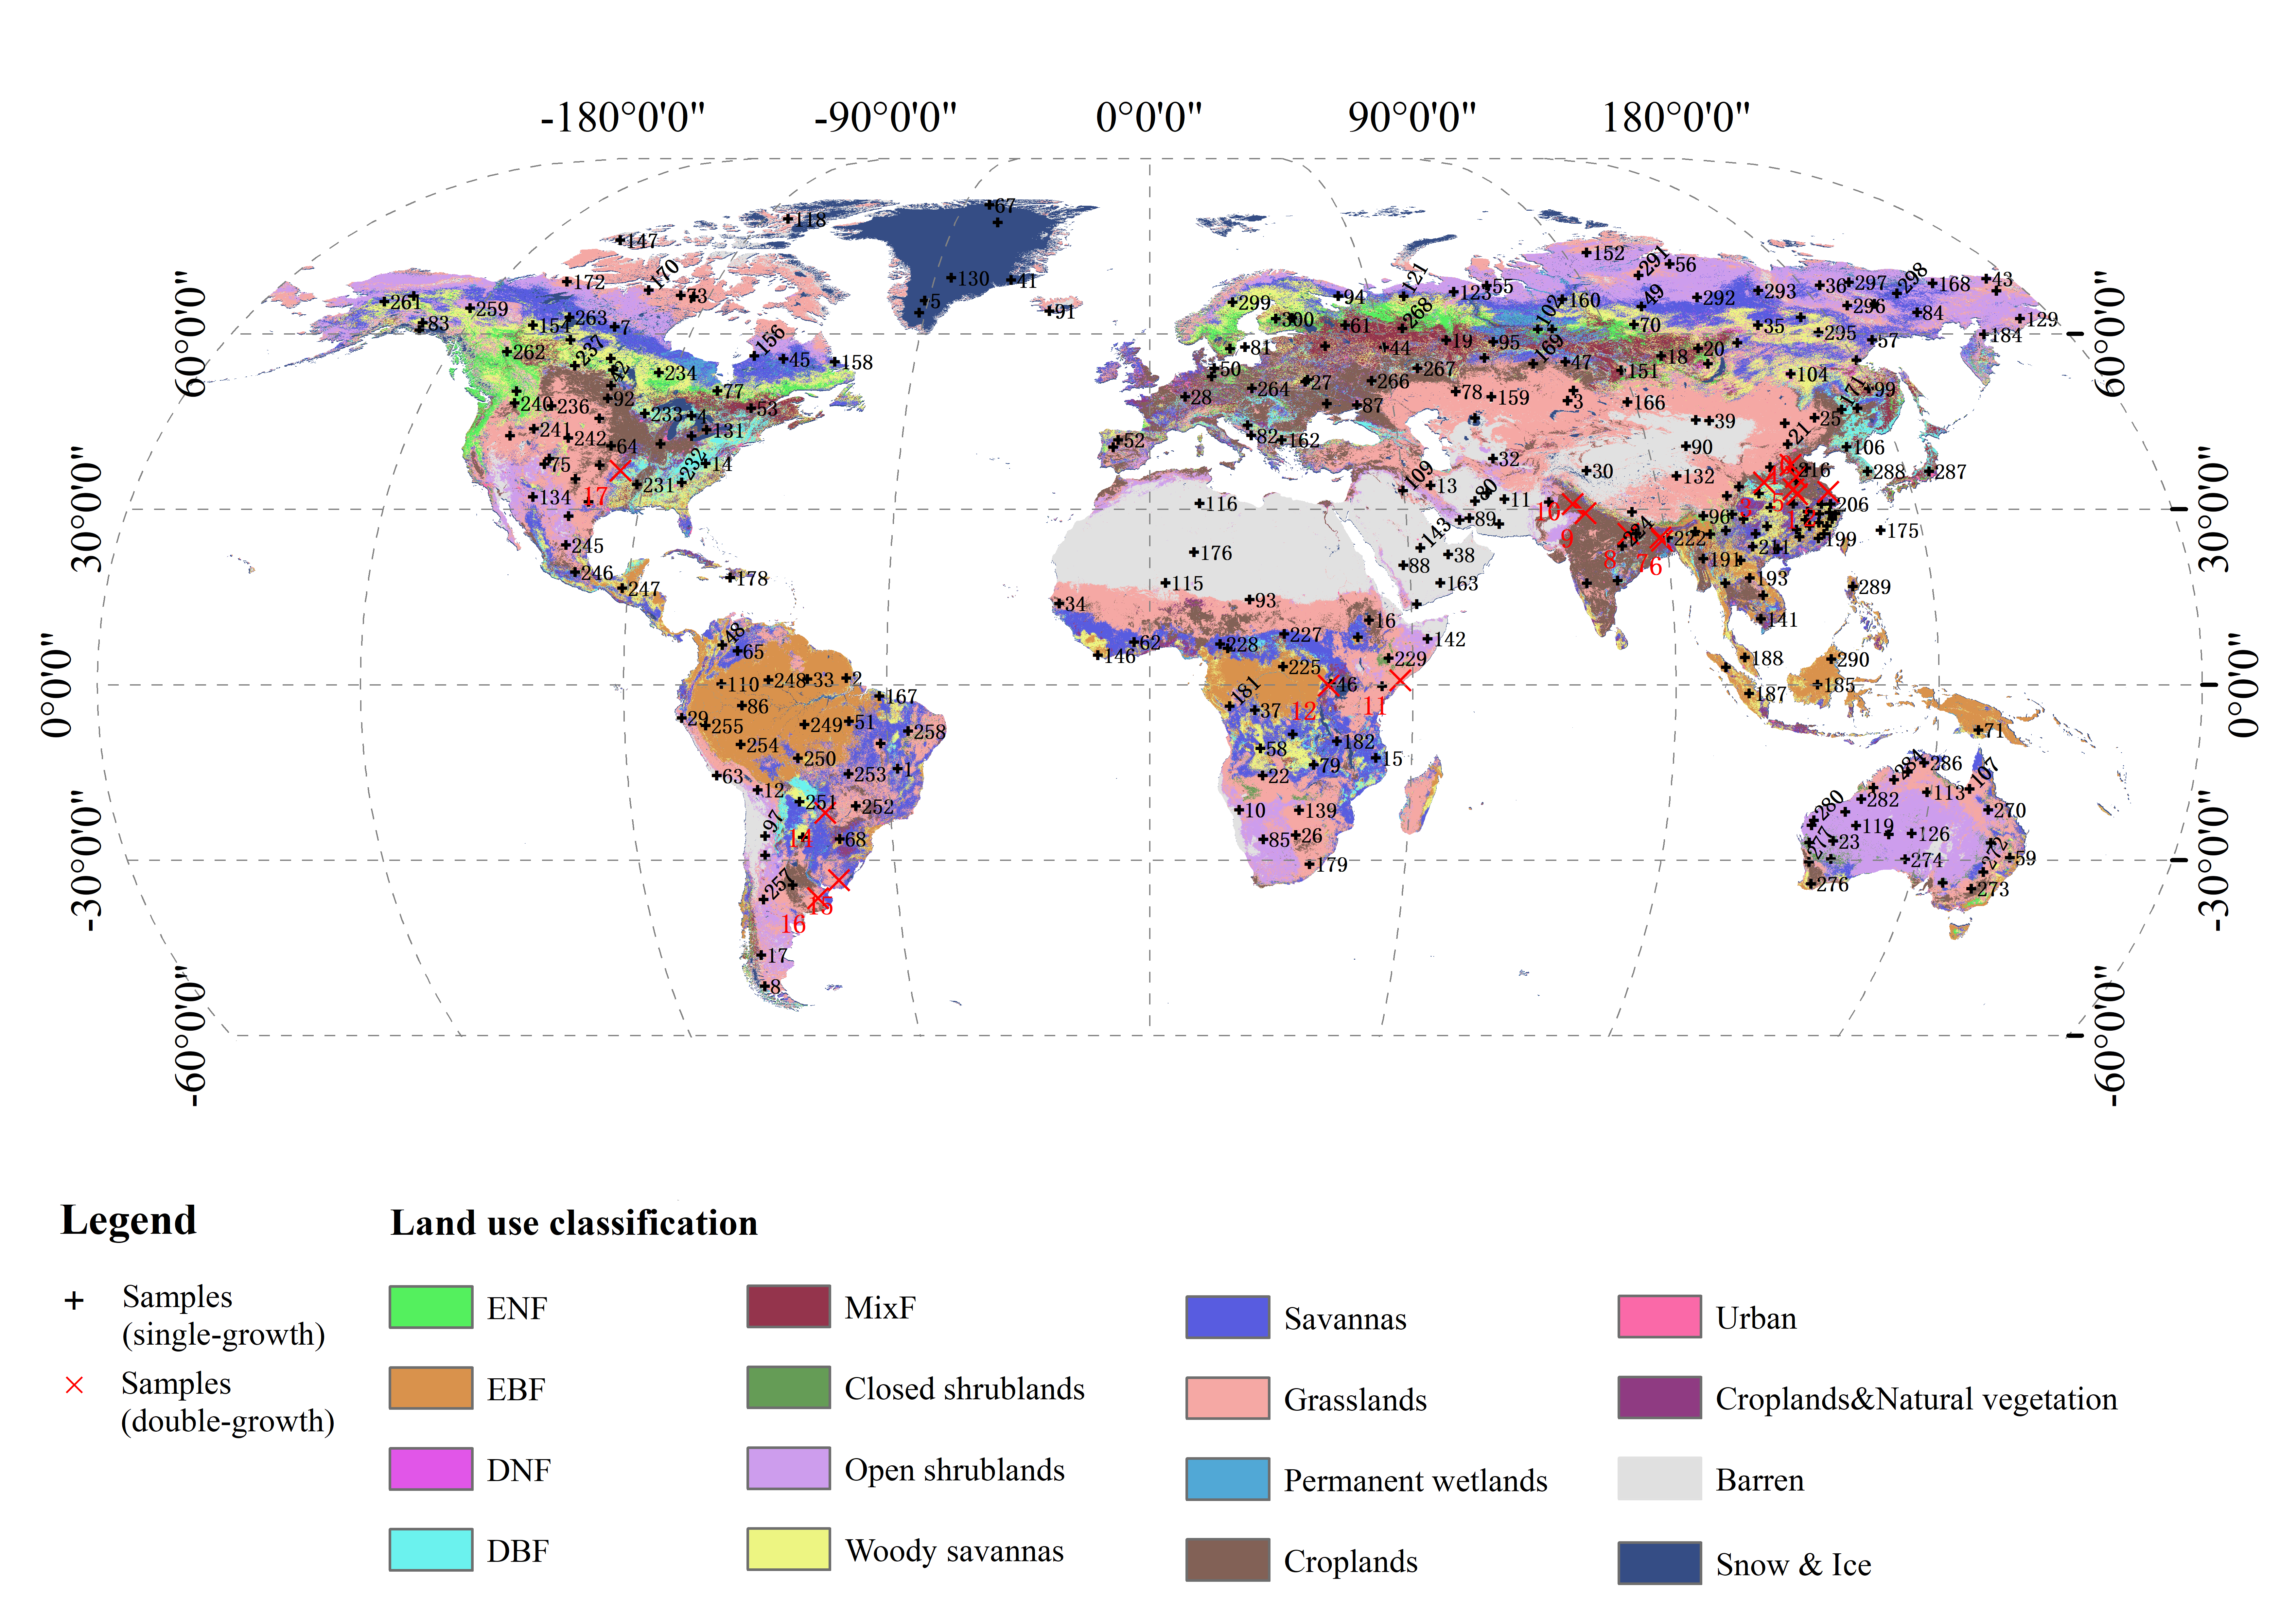

Supplement: s1 [file s1 › Figure S2.tif]

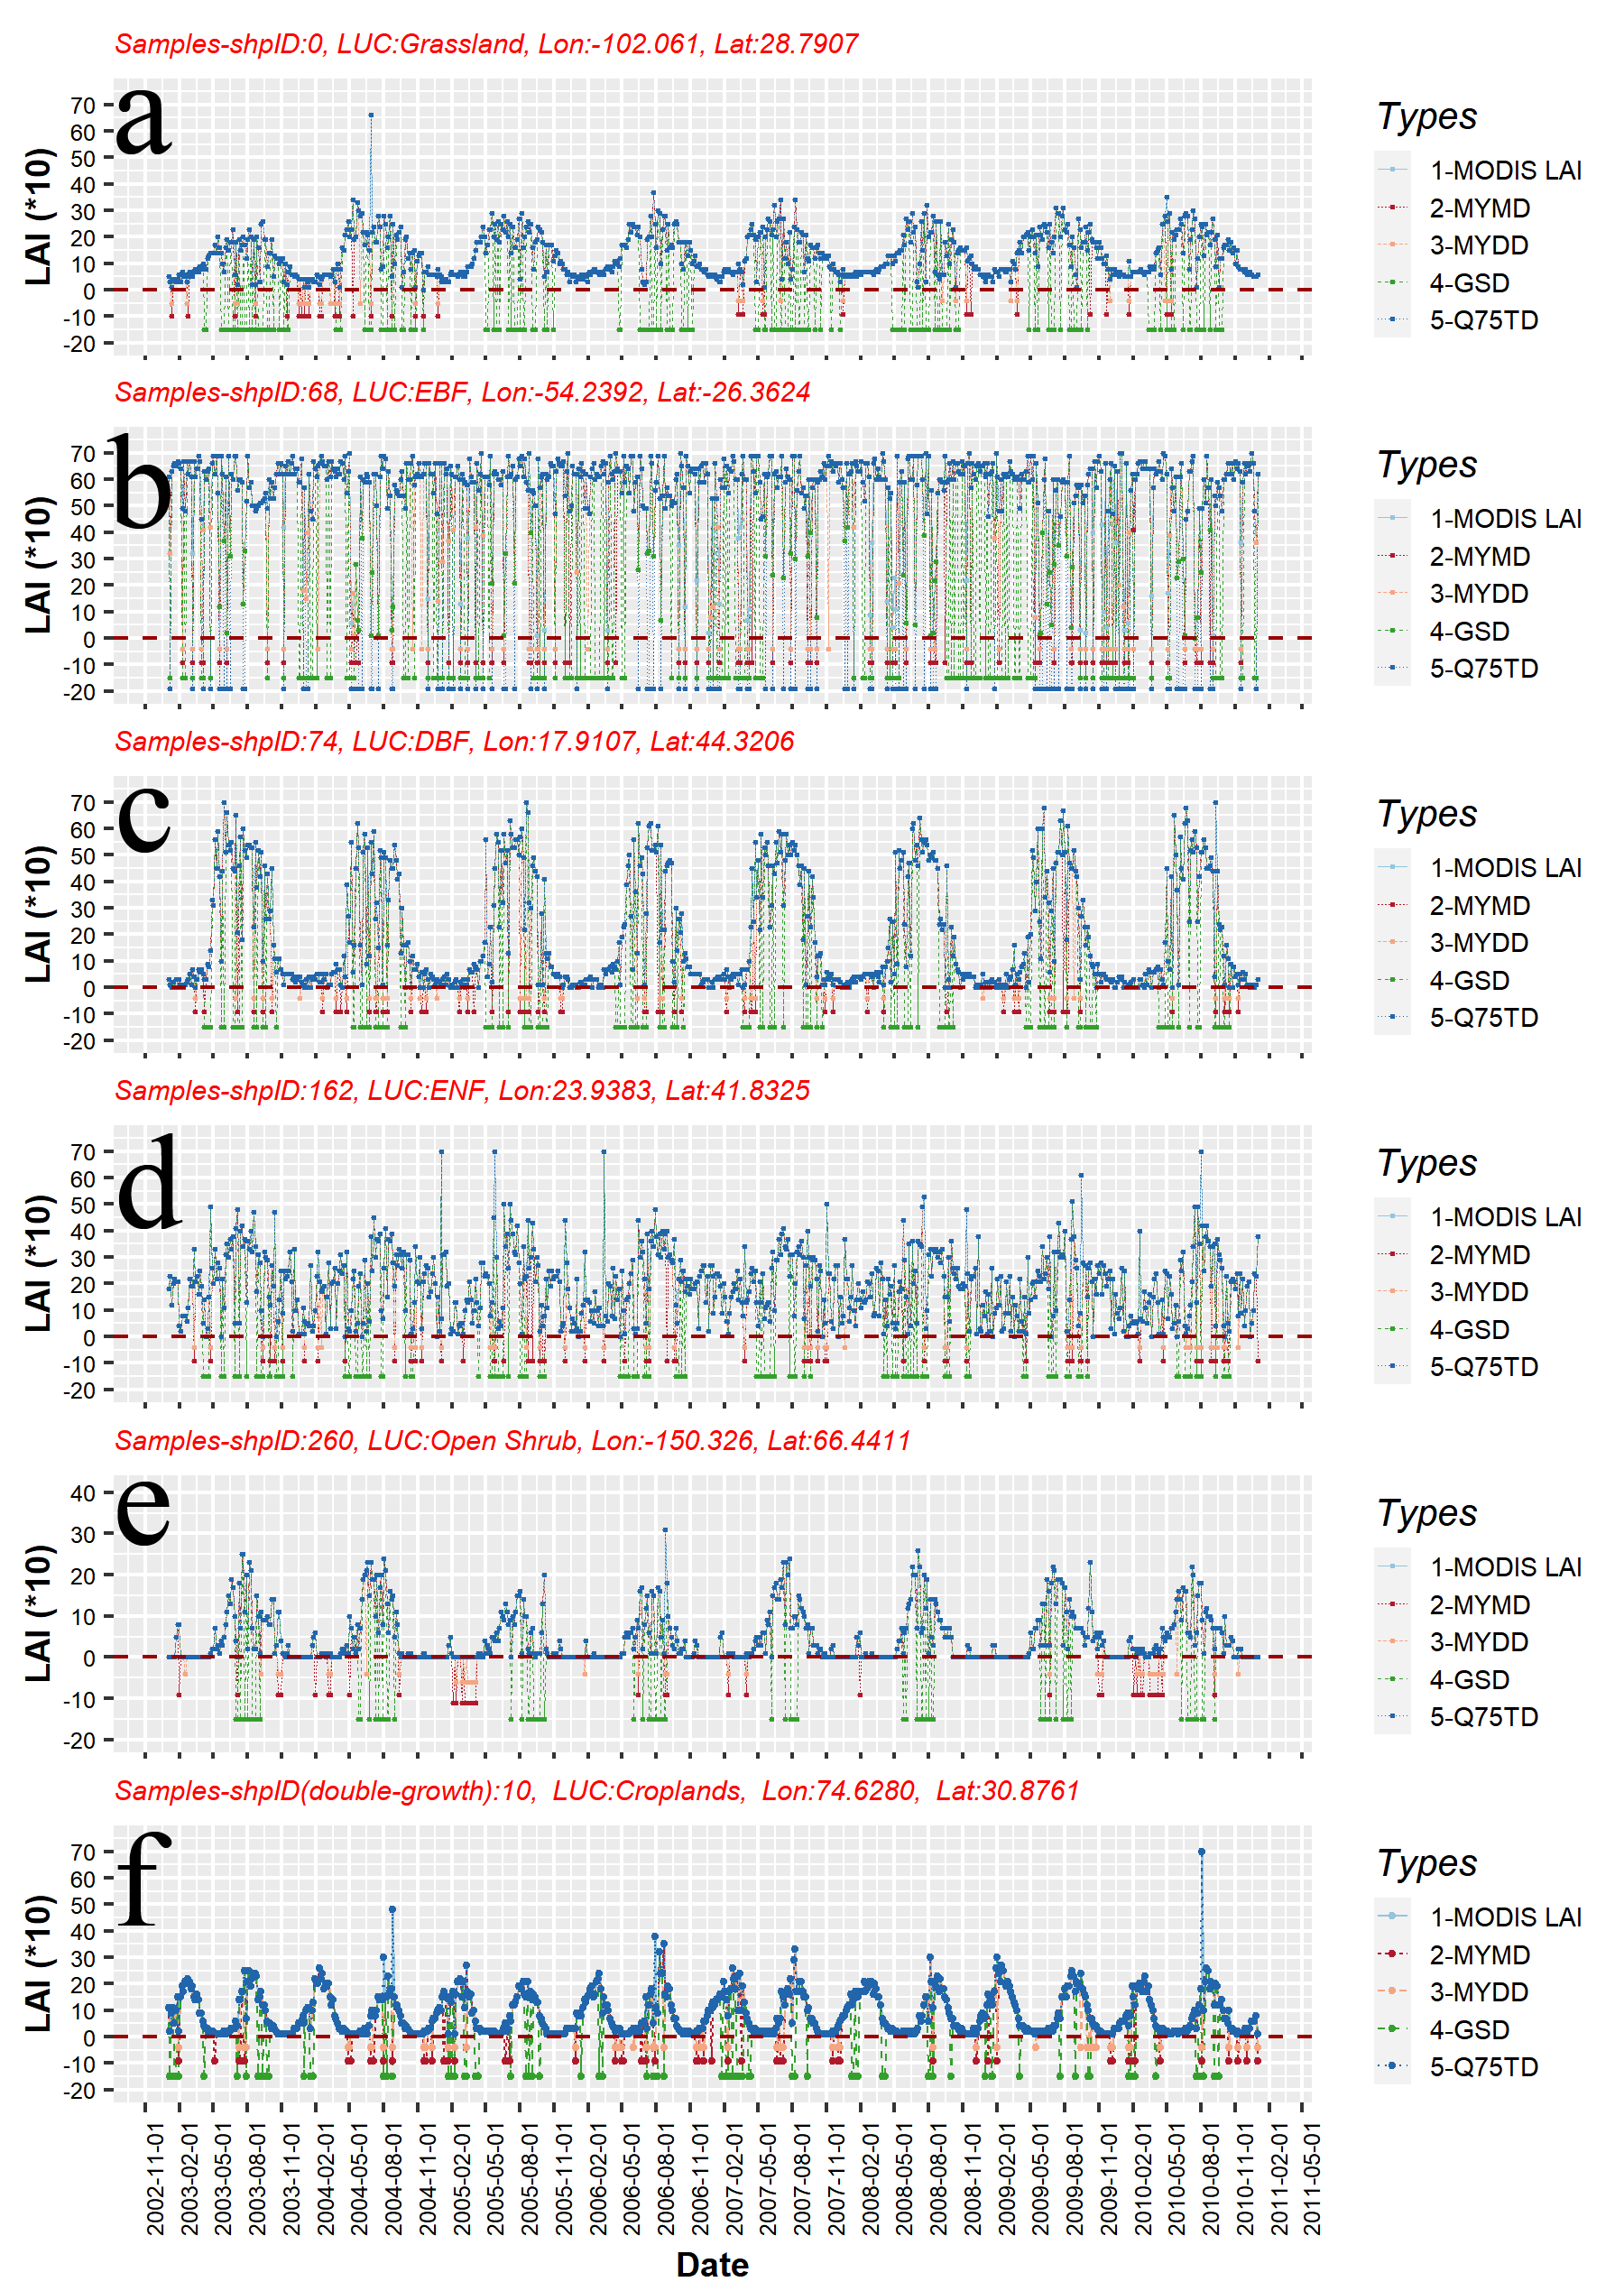

Supplement: s1 [file s1 › Figure S3.tif]
